# Supplementary material for: Examining ENSO-related variability in tropical tropospheric ozone in the RAQMS-Aura chemical reanalysis
Source: Copernicus journal article supplement (doi:10.5194/acp-24-10921-2024), 2024-09-27
Supplement: Supplementary file 1 [file acp-24-10921-2024-supplement.pdf]

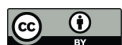

*Supplement of*

## **Examining ENSO-related variability in tropical tropospheric ozone in the RAQMS-Aura chemical reanalysis**

**Maggie Bruckner et al.**

*Correspondence to:* Maggie Bruckner (mebruckner@wisc.edu)

The copyright of individual parts of the supplement might differ from the article licence.

1 **S1. Influence of the QBO on RAQMS-Aura upper tropospheric ozone**

2 It has been suggested by prior studies (eg. Chandra et al., 2002; Lee et al., 2010; Oman et al., 2013; Ziemke and  
3 Chandra, 2012) that tropical upper troposphere ozone is impacted by the QBO. Here we 1) confirm the presence of a  
4 QBO in RAQMS-Aura, 2) evaluate the response of the tropical ozone profile to the QBO, and 3) compare the  
5 magnitude of the tropospheric ozone QBO response to the tropospheric ozone ENSO response.

6 Due to the re-initialization of RAQMS-Aura meteorology with archived NCEP GDAS analyses at 6 hour intervals, a  
7 QBO signature is present in the analysis (figure S1) in spite of the relatively coarse vertical resolution in the  
8 stratosphere. A similar ozone QBO feature is present in RAQMS-Aura due to the assimilation of Microwave Limb  
9 Sounder (MLS) stratospheric ozone profiles. We calculate QBO EOFs from the monthly mean zonal winds over  
10 Singapore (1°N, 104°E) from 70 to 10hPa (Wallace et al., 1993). The RAQMS-Aura QBO PCs are compared to  
11 QBO coefficients available from the NASA Atmospheric Chemistry and Dynamics Laboratory QBO website  
12 ([https://acd-ext.gsfc.nasa.gov/Data\\_services/met/qbo/qbo.html](https://acd-ext.gsfc.nasa.gov/Data_services/met/qbo/qbo.html)) (figure S2). The RAQMS-Aura QBO PCs and  
13 NASA QBO coefficients agree well, signifying that RAQMS-Aura has a realistic QBO zonal mean zonal wind  
14 signature.

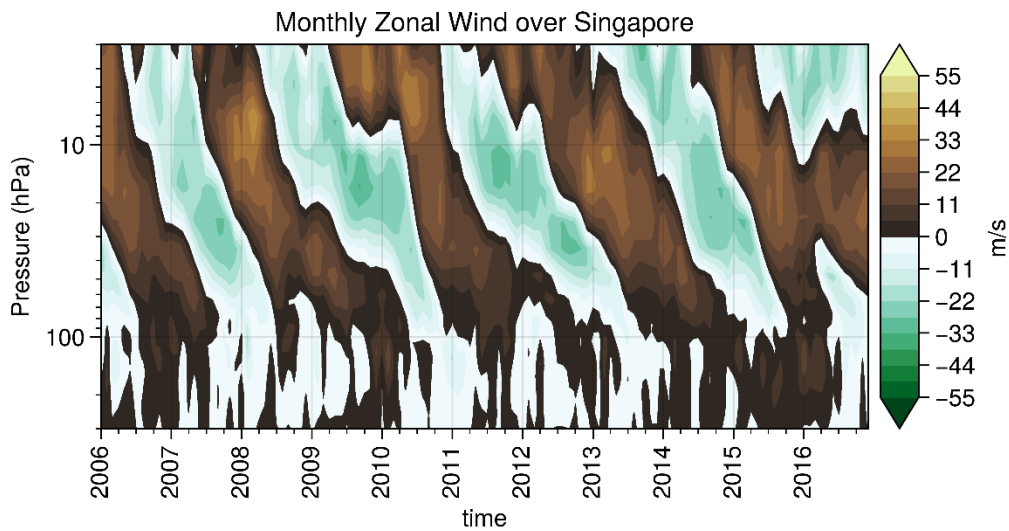

15

16 **Figure S1. Deseasonalized RAQMS-Aura monthly zonal wind over Singapore.**

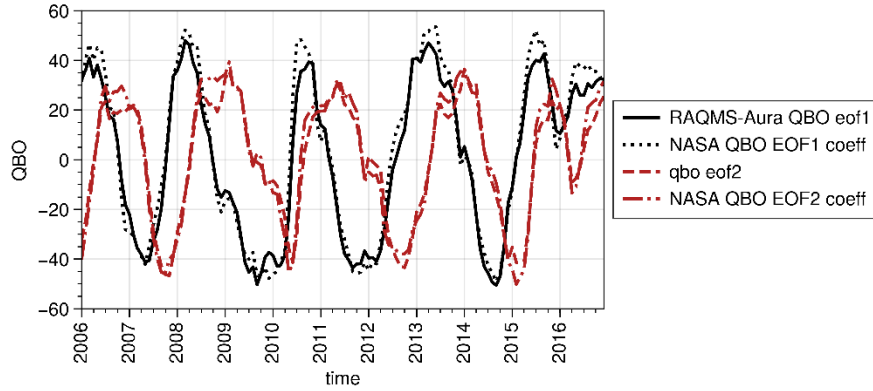

17

18 **Figure S2. Time series of the first (black) and second (red) QBO EOFs from 2006-2016 from RAQMS-Aura (solid) and**  
 19 **NASA Atmospheric Chemistry and Dynamics Laboratory QBO website ([https://acd-](https://acd-ext.gsfc.nasa.gov/Data_services/met/qbo/qbo.html)**  
 20 **ext.gsfc.nasa.gov/Data\_services/met/qbo/qbo.html) (dashed).**

21 Following Oman et al. 2013 we fit the multiple linear regression  $\Delta O_3(t) = \sum w_{x_j} \Delta X_j(t) + \epsilon(t)$  for the 2006-2016  
 22 period.  $X_j$  are the Nino 3.4 index, QBO PC<sub>1</sub>, and QBO PC<sub>2</sub>;  $\Delta O_3$  is the deseasonalized RAQMS-Aura ozone  
 23 mixing ratio at 100 hPa over the equator averaged over 180°W - 110°W;  $w_{x_j}$  and  $\epsilon$  are the regression coefficients.  
 24 The regression fit is shown in Figure S3a and should be compared to Figure 2 in Oman et al. 2013. The individual  
 25 contributions to the regression in Figure S3b. The obtained fit is not directly comparable to that obtained from MLS  
 26 data by Oman et al. 2013 as our regression is fit over a different time period. Despite these differences, we find the  
 27 magnitude of the QBO contributions to the regression fit relatively small compared to the ENSO contribution as  
 28 found by Oman et a 2013. From this, we conclude that the QBO has a slight impact on interannual variability in the  
 29 tropical upper troposphere but this impact is generally small relative to the ENSO impact on the region.

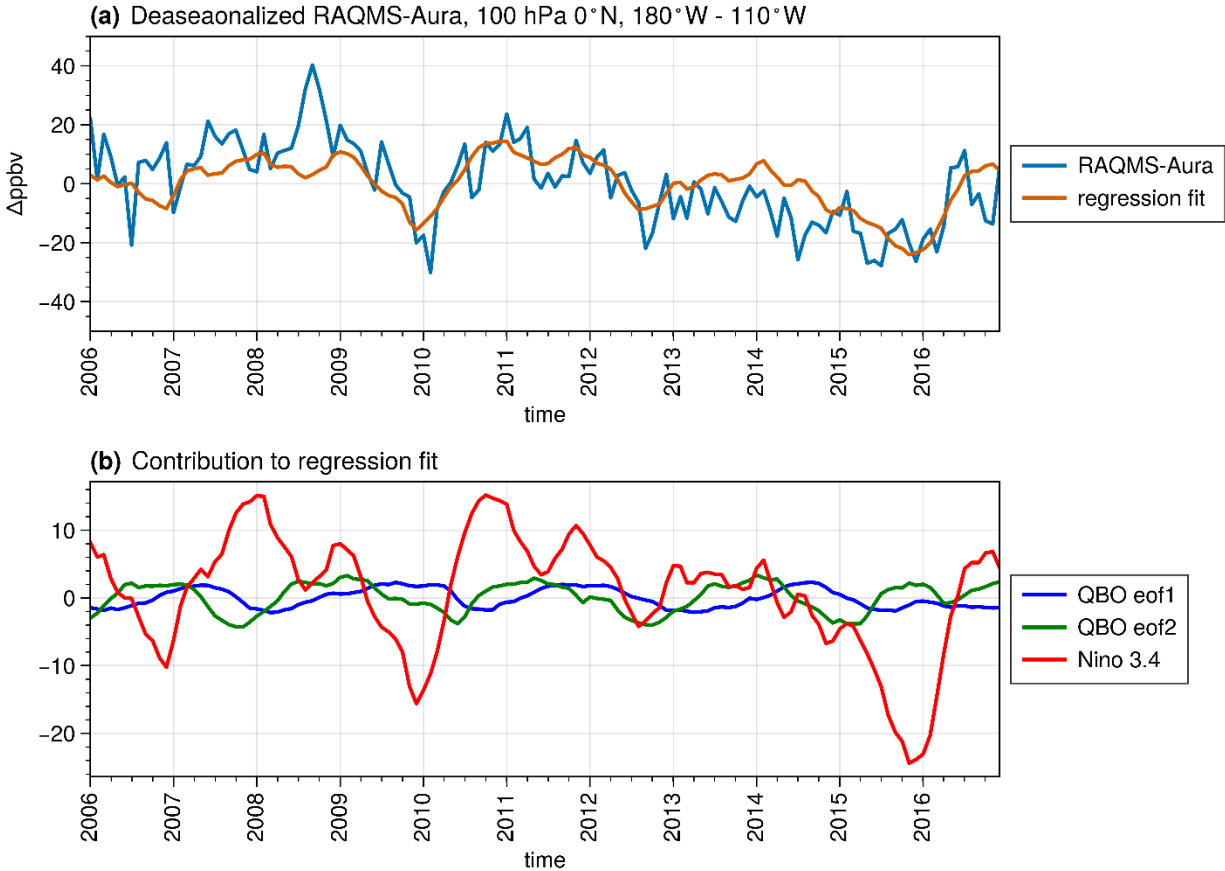

30

31 **Figure S3. a) Deseasonalized RAQMS-Aura ozone anomaly at 100 hPa over the equator averaged over 180°W - 110°W**  
 32 **and reconstructed from multiple linear regression. b) Contribution to the regression of the Nino 3.4 index, RAQMS-Aura**  
 33 **QBO PC<sub>1</sub>, and RAQMS-Aura QBO PC<sub>2</sub>.**

34

35 Chandra, S., Ziemke, J. R., Bhartia, P. K., and Martin, R. V.: Tropical tropospheric ozone: Implications for  
 36 dynamics and biomass burning, *Journal of Geophysical Research: Atmospheres*, 107, ACH 3-1-ACH 3-17,  
 37 <https://doi.org/10.1029/2001JD000447>, 2002.

38 Lee, S., Shelow, D. M., Thompson, A. M., and Miller, S. K.: QBO and ENSO variability in temperature and ozone  
 39 from SHADOZ, 1998–2005, *Journal of Geophysical Research: Atmospheres*, 115,  
 40 <https://doi.org/10.1029/2009JD013320>, 2010.

41 Oman, L. D., Douglass, A. R., Ziemke, J. R., Rodriguez, J. M., Waugh, D. W., and Nielsen, J. E.: The ozone  
 42 response to ENSO in Aura satellite measurements and a chemistry-climate simulation, *Journal of Geophysical*  
 43 *Research: Atmospheres*, 118, 965–976, <https://doi.org/10.1029/2012JD018546>, 2013.

44 Wallace, J. M., Panetta, R. L., and Estberg, J.: Representation of the Equatorial Stratospheric Quasi-Biennial  
 45 Oscillation in EOF Phase Space, 1993.

46 Ziemke, J. R. and Chandra, S.: Development of a climate record of tropospheric and stratospheric column ozone  
 47 from satellite remote sensing: Evidence of an early recovery of global stratospheric ozone, *Atmos. Chem. Phys.*  
 48 *Atmospheric Chemistry and Physics*, 12, 5737–5753, <https://doi.org/10.5194/acp-12-5737-2012>, 2012.
